# Supplementary material for: Proteomics Analysis of Dorsal Striatum Reveals Changes in Synaptosomal Proteins following Methamphetamine Self-Administration in Rats
Source: PLOS journal article supplement (doi:10.1371/journal.pone.0139829), 2015-10-20

**Supplementary Figure S3. Networks of differentially expressed proteins involved.** (A) Cell-to-cell signaling and interaction, nervous system development and function and cellular assembly and organization, IPA score = 55; **(B)** Cell morphology, cellular assembly and organization and cellular development, IPA score = 31; (C) Cellular compromise, cell morphology, cellular assembly and organization, IPA score = 21. Proteins shaded in green indicate down-regulation and red means up-regulation. The intensity of the shade corresponds to the degree of up (*red*) or down (*green*) regulation. Proteins in white are those identified through the Ingenuity Pathways Knowledge Base. The shapes denote the molecular class of the protein. A solid line indicates a direct molecular interaction, and a dashed line indicates an indirect molecular interaction. The cut-off score of network identification was 20.

Network (A)

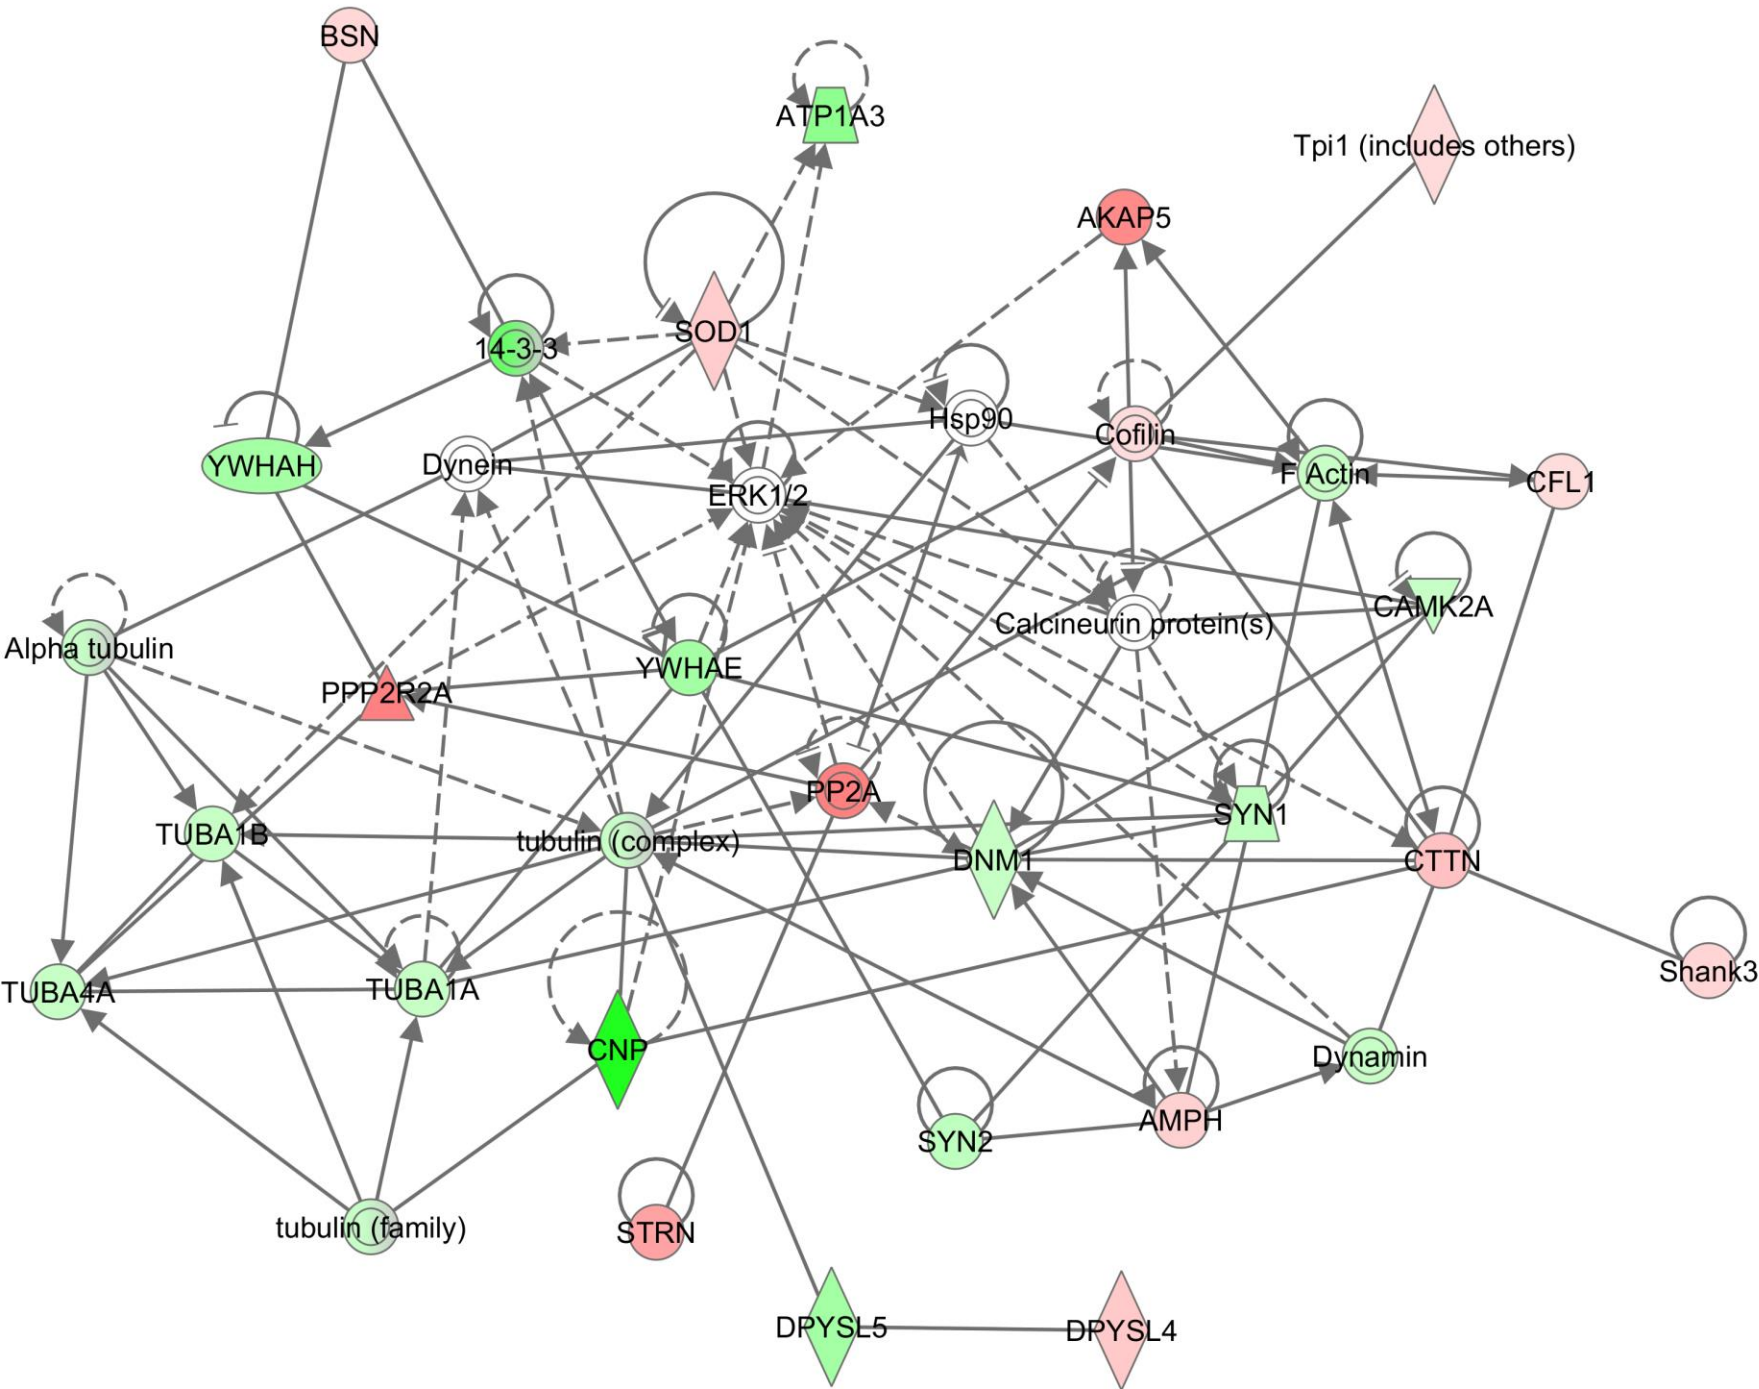

### Network (B)

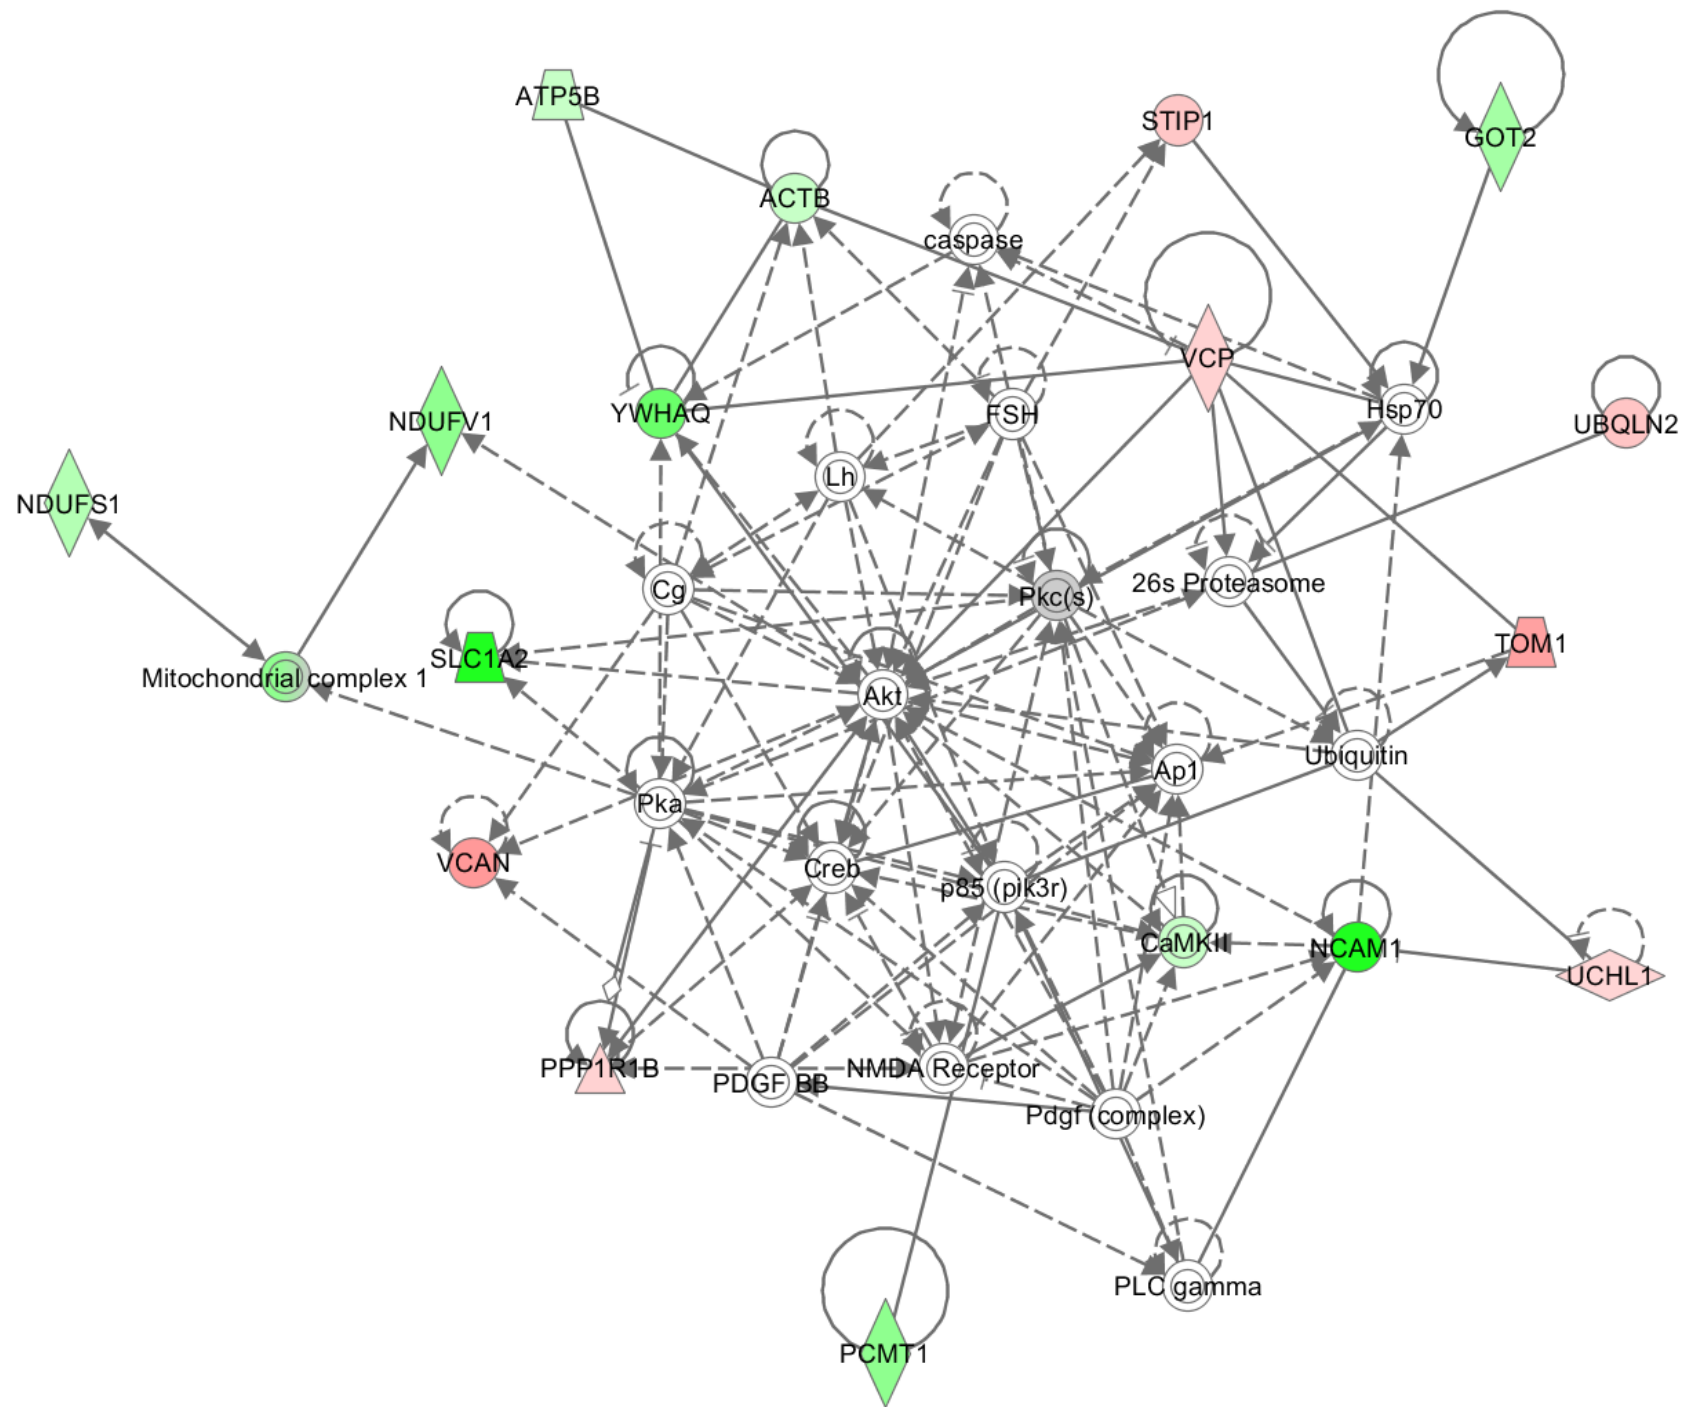

Network (C)

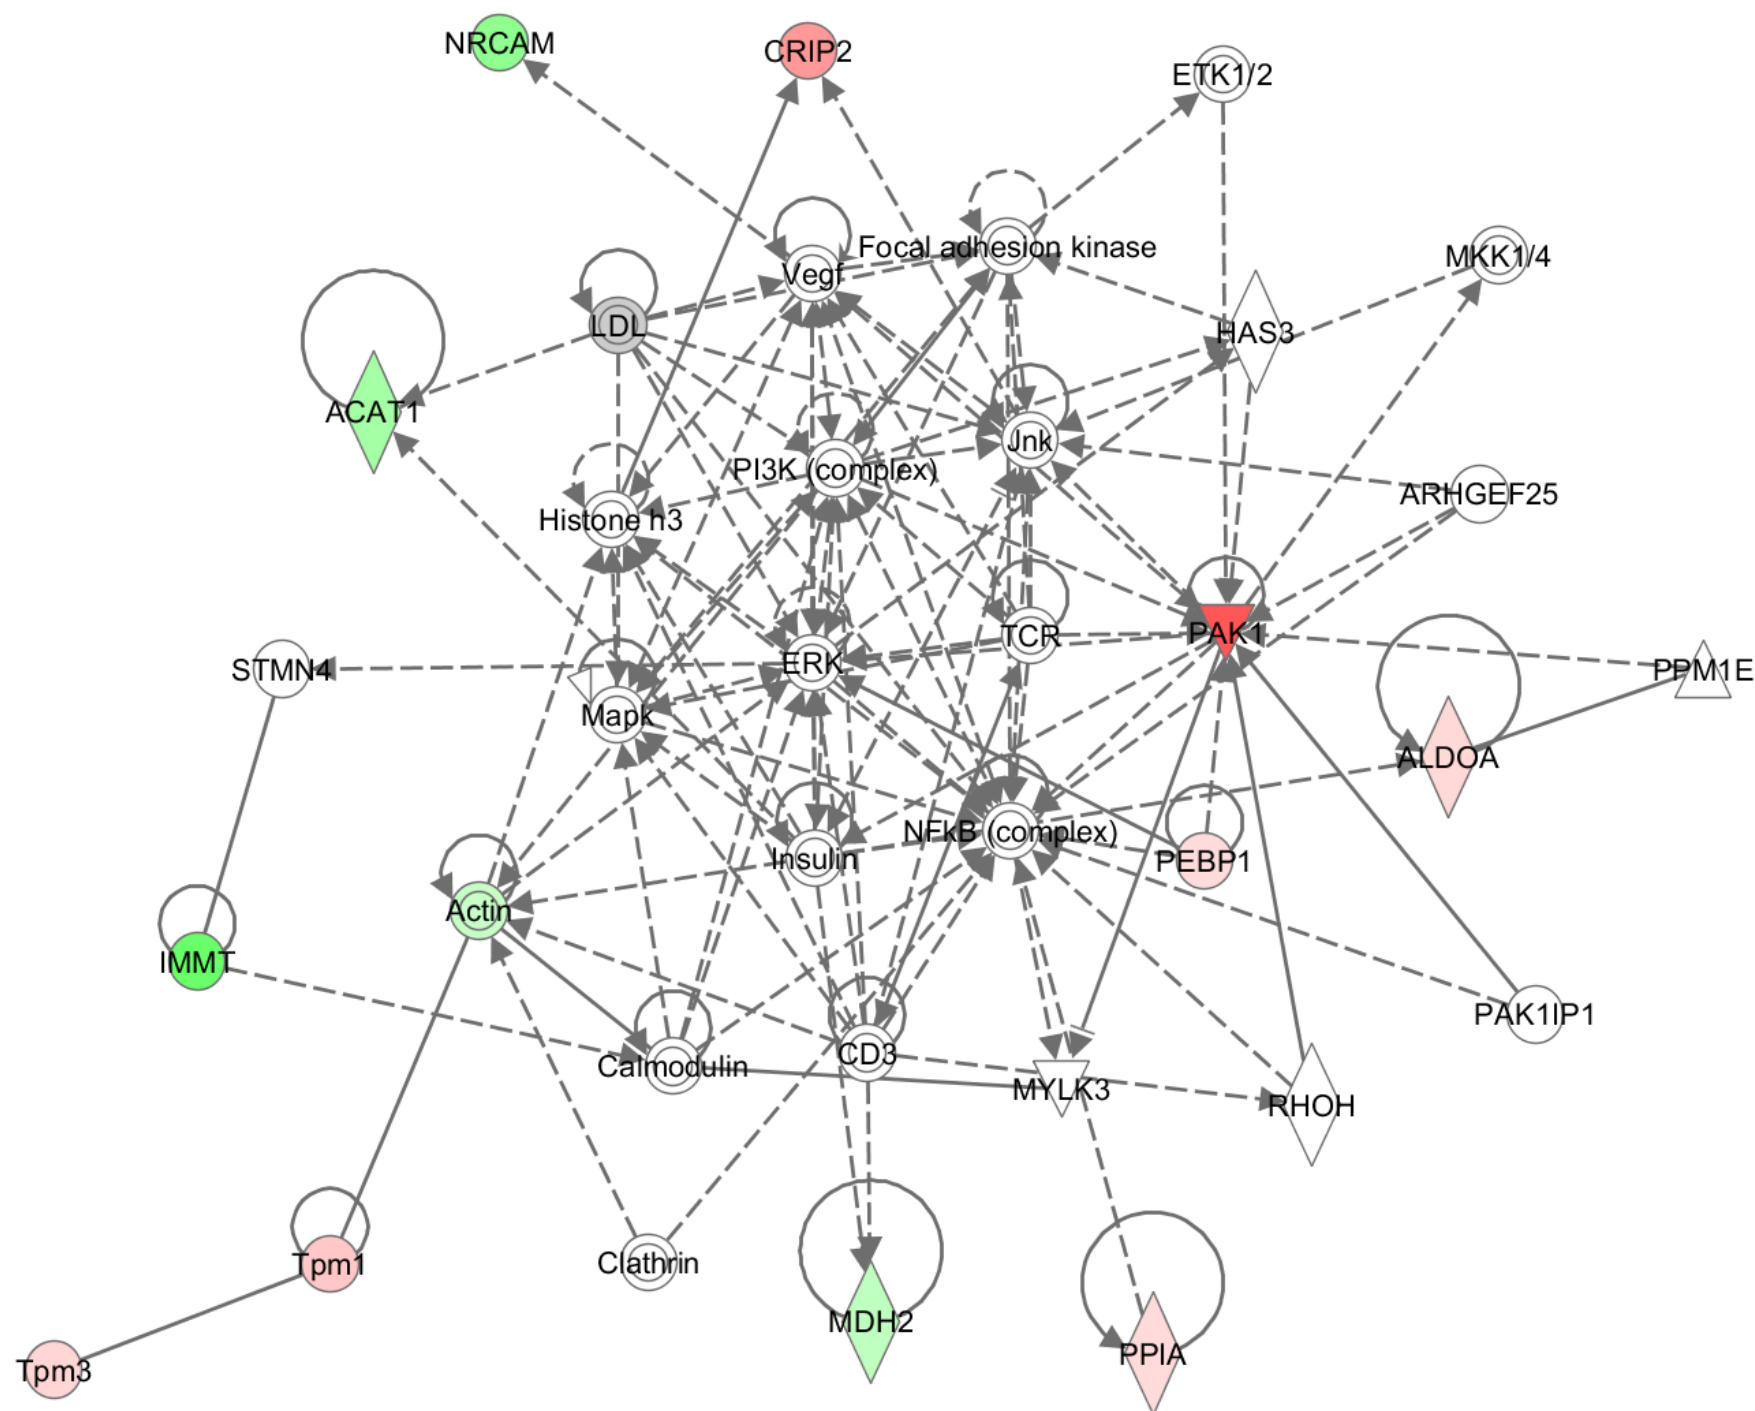

Supplement: S3 (10.1371/journal.pone.0139829.s003) [file journal.pone.0139829.s003]
